# Supplementary figures and images for: Polaron-induced changes in moiré exciton propagation in twisted van der Waals heterostructures
Source: Royal Society of Chemistry journal article supplement (doi:10.1039/d4nr00136b), 2024-01-01

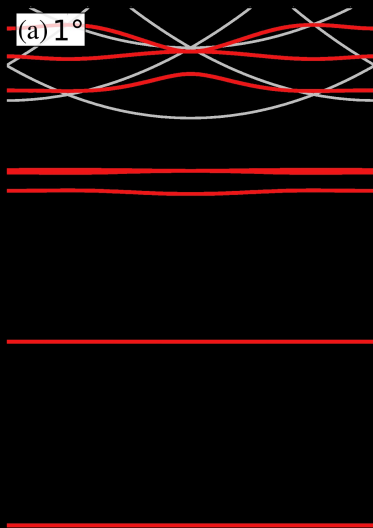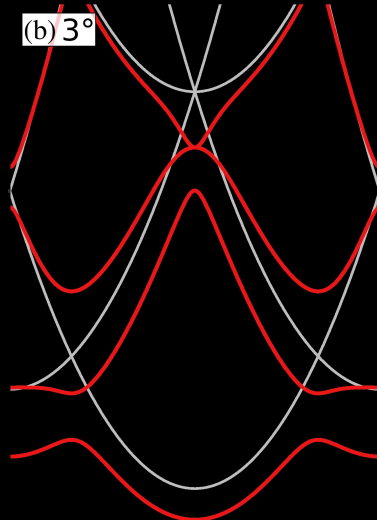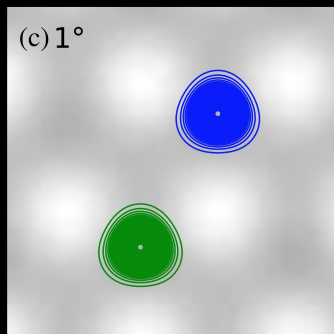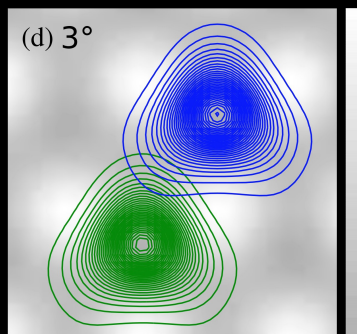

Supplement: d4nr00136b3.pdf [file d4nr00136b3.pdf]
